# Supplementary material for: Assessing the capability of Fourier transform infrared spectroscopy in tandem with chemometric analysis for predicting poultry meat spoilage
Source: PeerJ. 2018 Aug 6;6:e5376. doi: 10.7717/peerj.5376 (PMC6084285; doi:10.7717/peerj.5376)
Supplement: Data S1 [file peerj-06-5376-s001.xlsx]

## Sheet: Sheet1
Table 1: Microbial kinetics of poultry meat during refrigeration storage
Days	Parameters
											Days	Total plate count CFU/cm2	Enterobacteriaceae count CFU cm2
	(Xlog 102 CFU/cm2)										D0	3.04	2.39
D0	3.04±0.05e										D2	4.6	3.23
D2	4.60±0.03d										D4	4.94	4.4
D4	4.94±0.01c										D6	6.44	5.03
D6	6.44±0.01b										D8	8.2	6.33
D8	8.20±0.01a
					Enterobacteriacea count
					FTIR Spectrum (Xlog 102 CFU/cm2)
					2.39±0.01e
					3.23±0.02d
					4.40±0.01c
					5.03±0.02b
					6.33±0.01a

## Sheet: Sheet2
	TPC	Enterobacterieace	Colour	pH	TVB N	Shear force
TPC	1	0.945809	-0.200751	-0.0144886	0.944644	0.461692
Enterobacterieace	0.945809	1	-0.156278	-0.0772488	0.934467	0.431937
Colour	-0.200751	-0.156278	1	0.418454	-0.107333	-0.483619
pH	-0.0144886	-0.0772488	0.418454	1	0.00909876	-0.328045
TVB N	0.944644	0.934467	-0.107333	0.00909876	1	0.412606
Shear force	0.461692	0.431937	-0.483619	-0.328045	0.412606	1
	TPC	Enterobacterieace	Colour	pH	TVB N	Shear force
# of Missing	0	0	0	0	0	0
Mean	4.0291	3.4796	92.1	5.81034	14.4648	23.3697
Max	8.205	6.335	182	7.05	33.6	39.2355
Min	2.06	1.59	57	4.65	6.72	8.9965
Range	6.145	4.745	125	2.4	26.88	30.239
Std Deviation	1.40532	1.13126	28.0293	0.795772	5.43665	6.79357
Variance	1.97493	1.27975	785.643	0.633253	29.5572	46.1525
RMS	4.26252	3.65538	96.1891	5.8635	15.4336	24.3182
Skewness	0.840822	0.35611	0.980201	0.128814	1.16344	0.126455
Kurtosis	0.504636	-0.732555	1.04917	-1.5116	2.03078	-0.147937
Median	3.915	3.3925	94.75	5.84	13.44	23.87
Q1	2.97625	2.41	66.625	5.04	10.92	18.8852
Q3	5.025	4.39	107.5	6.6	17.64	27.7129

## Sheet: Sheet3
	TPC	Entero	Colour	pH	TVB n	Shear force
Maximum	8.205	6.335	99.5	6.39	33.6	38.743
Minimum	3.02	2.39	67	6.3	10.92	21.6755
median	4.94	4.405	97.5	6.36	19.32	27.702
Q1	4.605	3.235	74	6.345	14.28	26.0525
Q3	6.44	5.02	98.5	6.39	20.16	32.5
	Mean	SD
TPC	5.442	1.96525
Entero	4.277	1.53707
Colour	87.3	15.5507
pH	6.357	0.0373496
TVB n	19.656	8.66056
Shear force	29.3346	6.53141
Variable Correlation
	TPC	Entero	Colour	pH	TVB n	Shear force
TPC	1	0.977081	-0.813662	-0.178708	0.952653	0.9986
Entero	0.977081	1	-0.784388	-0.00607409	0.959948	0.980605
Colour	-0.813662	-0.784388	1	0.0923283	-0.672983	-0.816854
pH	-0.178708	-0.00607409	0.0923283	1	0.0331114	-0.132514
TVB n	0.952653	0.959948	-0.672983	0.0331114	1	0.962992
Shear force	0.9986	0.980605	-0.816854	-0.132514	0.962992	1

## Sheet: Sheet4
	TPC	Entero	Colour	pH	TVB n	Shear force
Maximum	8.205	6.335	99.5	6.39	33.6	38.743
Minimum	3.02	2.39	67	6.3	10.92	21.6755
median	4.94	4.405	97.5	6.36	19.32	27.702
Q1	4.605	3.235	74	6.345	14.28	26.0525
Q3	6.44	5.02	98.5	6.39	20.16	32.5
	Mean	SD
TPC	5.442	1.96525
Entero	4.277	1.53707
Colour	87.3	15.5507
pH	6.357	0.0373496
TVB n	19.656	8.66056
Shear force	29.3346	6.53141
Variable Correlation
	TPC	Entero	Colour	pH	TVB n	Shear force
TPC	1	0.977081	-0.813662	-0.178708	0.952653	0.9986
Entero	0.977081	1	-0.784388	-0.00607409	0.959948	0.980605
Colour	-0.813662	-0.784388	1	0.0923283	-0.672983	-0.816854
pH	-0.178708	-0.00607409	0.0923283	1	0.0331114	-0.132514
TVB n	0.952653	0.959948	-0.672983	0.0331114	1	0.962992
Shear force	0.9986	0.980605	-0.816854	-0.132514	0.962992	1

## Sheet: Sheet5
							Regression (50 spectra vs TPC)

## Sheet: Sheet7
rep	day	TPC	Entero	pH	TVBN	Color	Hardness
1	0	3.05	2.38	6.25	11.76	97	24.759
1	2	4.58	3.25	6.31	13.44	103	25.613
1	4	4.94	4.4	6.36	20.16	94	27.572
1	6	6.44	5.03	6.63	21.84	75	33.239
1	8	8.21	6.33	6.94	31.92	64	37.827
2	0	3.09	2.39	6.53	11.76	111	24.312
2	2	4.59	3.23	6.25	11.76	103	26.528
2	4	4.93	4.39	6.32	15.12	100	27.126
2	6	6.45	5.05	6.57	25.2	69	30.623
2	8	8.19	6.32	6.81	36.96	70	38.873
3	0	2.99	2.4	6.39	10.08	100	18.592
3	2	4.63	3.22	6.34	15.12	96	26.492
3	4	4.94	4.41	6.37	18.48	101	27.832
3	6	6.44	5.01	6.48	28.16	70	31.761
3	8	8.2	6.34	6.78	35.28	73	39.659

## Sheet: Sheet8
TPC	Enterobacterieace	Colour	pH	TVB N	Shear force	2997.32	2995.39	2993.46	2991.53	2989.6	2987.67	2985.74	2983.82	2981.89	2979.96	2978.03	2976.1	2974.17	2972.24	2970.31	2968.39	2966.46	2964.53	2962.6	2960.67	2958.74	2956.81	2954.88	2952.95	2951.03	2949.1	2947.17	2945.24	2943.31	2941.38	2939.45	2937.53	2935.6	2933.67	2931.74	2929.81	2927.88	2925.95	2924.02	2922.09	2920.17	2918.24	2916.31	2914.38
3.02	2.39	98.5	6.39	10.92	21.6755	-0.00158229	-0.00150885	-0.00145832	-0.00149067	-0.00157567	-0.00161026	-0.00163625	-0.00168911	-0.00166156	-0.00157562	-0.00157513	-0.00162921	-0.00163086	-0.00161675	-0.00161834	-0.00159463	-0.00156131	-0.00154324	-0.00152093	-0.0015225	-0.00156725	-0.00154939	-0.00145632	-0.00142662	-0.00147419	-0.001545	-0.00162635	-0.00166214	-0.0016281	-0.00159681	-0.00158707	-0.00153656	-0.00150013	-0.00154335	-0.00155329	-0.00146819	-0.00144219	-0.00159547	-0.00181609	-0.00192919	-0.00187064	-0.0017138	-0.00160828	-0.00157251
4.605	3.235	99.5	6.3	14.28	26.0525	-0.0358157	-0.0361421	-0.0365567	-0.0369659	-0.0372265	-0.0375252	-0.0380606	-0.0388221	-0.0394696	-0.0396477	-0.0396807	-0.0400504	-0.0406179	-0.0409888	-0.0411468	-0.0412427	-0.0412795	-0.0412571	-0.0411694	-0.0410999	-0.0410806	-0.0409684	-0.0409093	-0.0410798	-0.0412323	-0.0411695	-0.0410276	-0.0409796	-0.0410109	-0.0409998	-0.0409131	-0.0407848	-0.040589	-0.0403273	-0.0401251	-0.0400362	-0.0399951	-0.0400323	-0.0401699	-0.0402392	-0.0400126	-0.0394774	-0.0388631	-0.0383269
4.94	4.405	97.5	6.39	19.32	27.702	0.051401	0.0511163	0.0507793	0.050426	0.0501208	0.0498796	0.0496882	0.0496617	0.0496797	0.0494786	0.0492414	0.0492158	0.0491919	0.0489148	0.0486247	0.0486325	0.0486884	0.0483893	0.047808	0.0472967	0.0468973	0.0464157	0.0458738	0.0453388	0.0447162	0.0440058	0.0433607	0.0428214	0.0423107	0.0418331	0.04141	0.0409903	0.0405177	0.0399911	0.0394708	0.0389754	0.0385116	0.0381389	0.0377613	0.0372202	0.0364987	0.035609	0.0345951	0.0334897
6.44	5.02	67	6.345	20.16	32.5	-0.000157242	-0.000174282	-0.000242663	-0.000330515	-0.000356483	-0.000360274	-0.000406053	-0.000423505	-0.000434129	-0.000563231	-0.000765373	-0.000923342	-0.00106069	-0.0012785	-0.0015318	-0.00175719	-0.00206897	-0.00248418	-0.00289756	-0.00325291	-0.00350297	-0.00368759	-0.0038647	-0.00398443	-0.00400418	-0.00392595	-0.00375927	-0.00355873	-0.00342957	-0.00338117	-0.00326655	-0.00307147	-0.0029676	-0.00299313	-0.00308409	-0.00320219	-0.00320388	-0.00298194	-0.00269589	-0.00256696	-0.00260594	-0.00271203	-0.00281991	-0.00283819
8.205	6.335	74	6.36	33.6	38.743	-0.00175274	-0.0016881	-0.00164555	-0.00162684	-0.001611	-0.00157077	-0.00152959	-0.00143772	-0.00127426	-0.00117618	-0.00120003	-0.00122579	-0.00120882	-0.00121869	-0.00120947	-0.00114501	-0.00112111	-0.0011685	-0.00127423	-0.00137938	-0.0013672	-0.0013027	-0.00133154	-0.001399	-0.00139851	-0.00136853	-0.00136716	-0.00134271	-0.00124831	-0.00117174	-0.00120214	-0.00126782	-0.00133198	-0.00145897	-0.00155301	-0.00151489	-0.00144319	-0.00134831	-0.00119351	-0.00112707	-0.00118751	-0.0012608	-0.00139065	-0.00156219
[truncated: 1,097 more columns]
